# Supplementary material for: A solid-state electrolyte for electrochemical lithium–sulfur cells
Source: Royal Society of Chemistry journal article supplement (doi:10.1039/d3ra05937e), 2024-01-01
Supplement: d3ra05937e1.pdf [file d3ra05937e1.pdf]

## Electronic Supplementary Information

Solid-state Electrolyte for Electrochemical Lithium–Sulfur Cells

Yi-Chen Huang,<sup>a</sup> Bo-Xian Ye<sup>a</sup> and Sheng-Heng Chung<sup>\*ab</sup>

<sup>a</sup> Department of Materials Science and Engineering, National Cheng Kung University, No.1 University Road, Tainan City 70101, Taiwan

<sup>b</sup> Hierarchical Green-Energy Materials Research Center, National Cheng Kung University, No.1 University Road, Tainan City 70101, Taiwan

\*Sheng-Heng Chung: [SHChung@gs.ncku.edu.tw](mailto:SHChung@gs.ncku.edu.tw)

## Supporting Figures

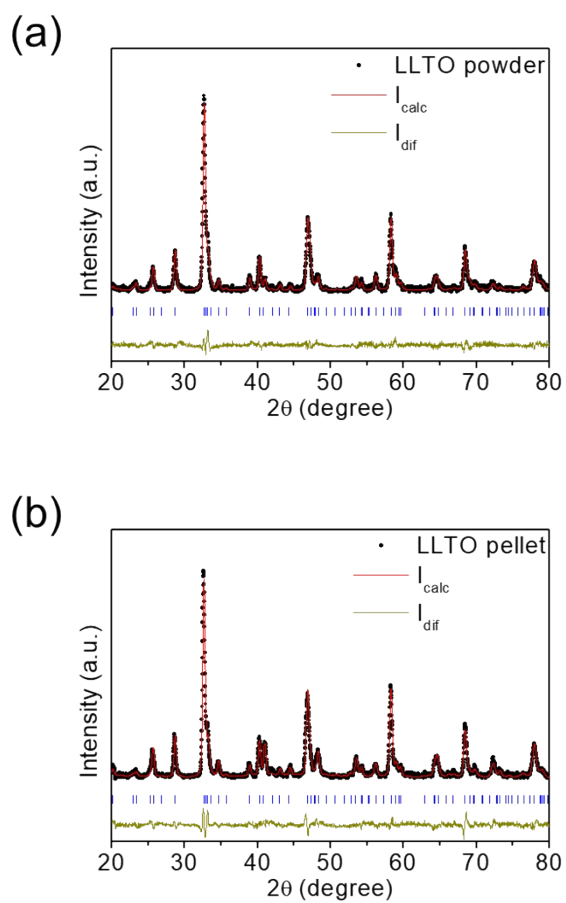

**Fig. S1** Experimental (black) and calculated (red) X-ray diffraction (XRD) patterns of lithium lanthanum titanate (LLTO) solid-state electrolyte: (a) raw powder and (b) sintered pellet.

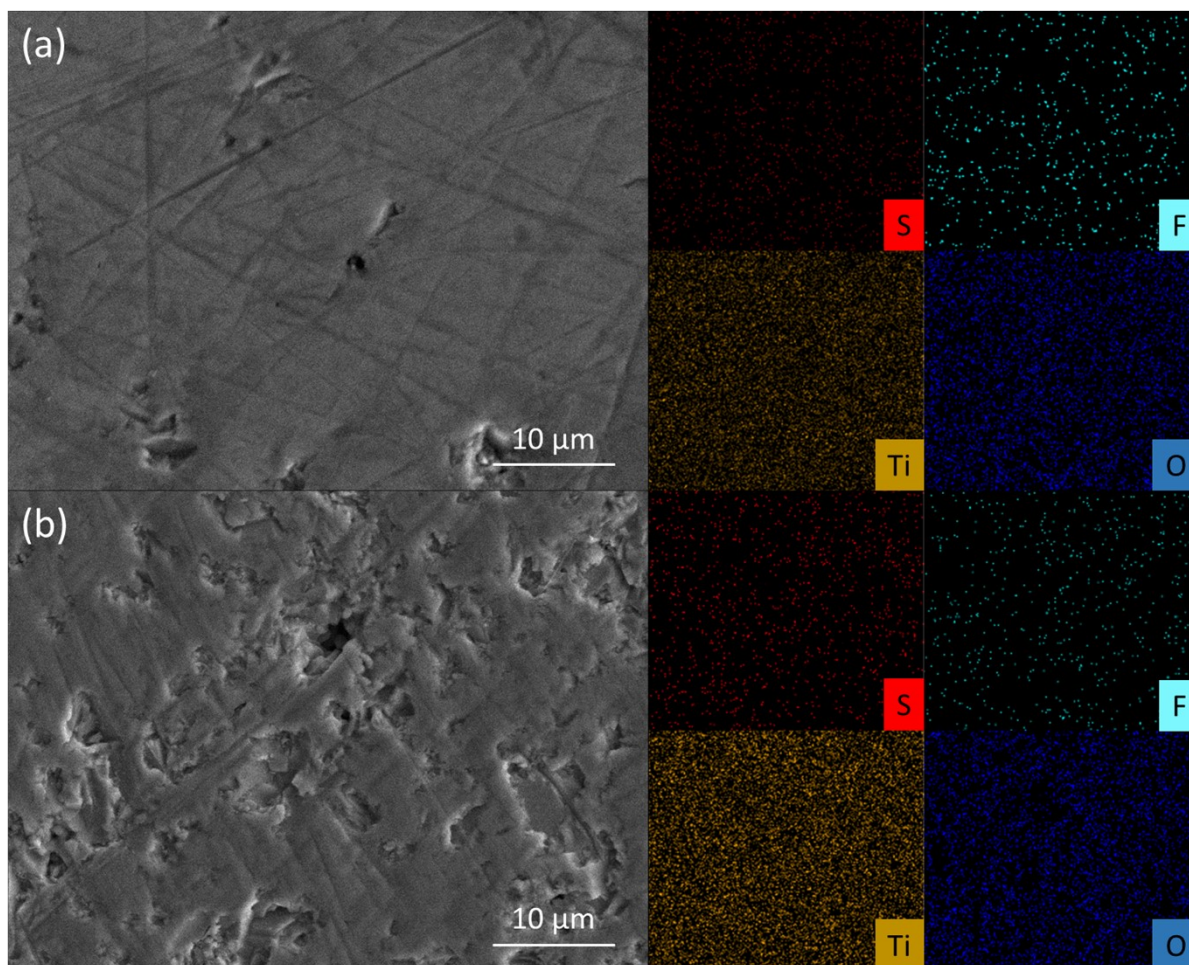

**Fig. S2.** Scanning electron microscopy (SEM) and the corresponding energy-dispersive X-ray spectroscopy (EDS) elemental mapping results of cycled LLTO sample facing (a) the lithium electrode and (b) the polysulfide electrode.
